# Supplementary material
Source: Springer Nature journal article supplement (https://www.springermedizin.de/resource/supplementary/13047_2009_113_MOESM1_ESM.pdf/9663210)

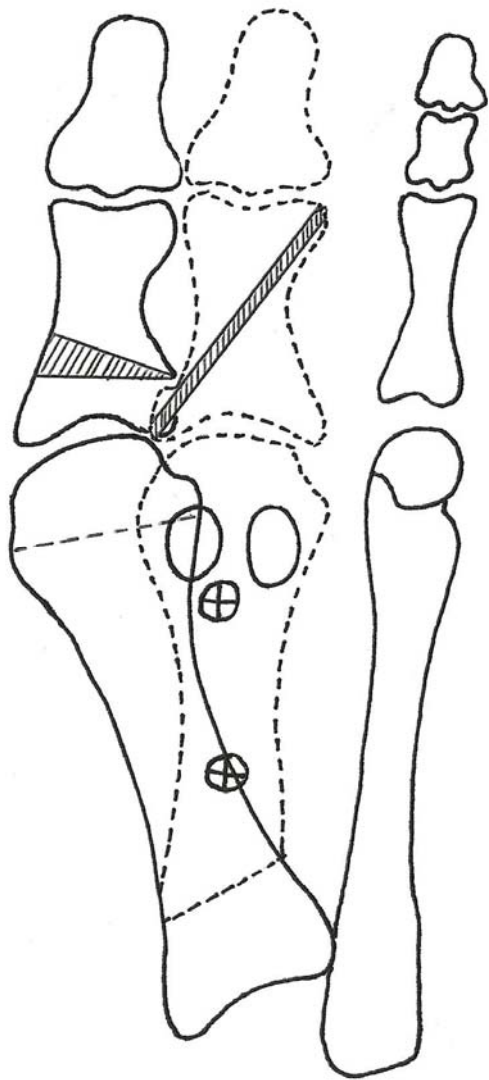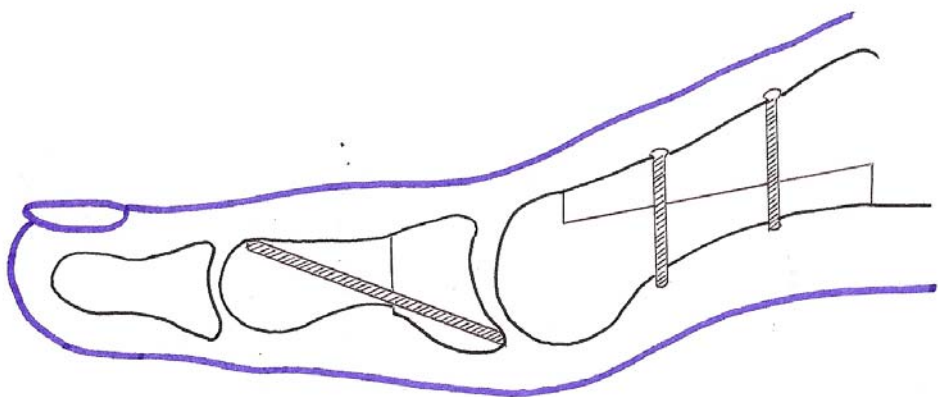

Supplement: MOESM1 [file 9663210]
